# Supplementary material
Source: PubMed Central journal article supplement (PMC1895241)
Supplement: blood_2005-04-1674_1.pdf [file blood_2005-04-1674_1.pdf]

| <b>mouse</b>                                        | <b>Wbc<sup>*</sup></b> | <b>Hb<sup>**</sup></b> | <b>Plt<sup>***</sup></b> |
|-----------------------------------------------------|------------------------|------------------------|--------------------------|
| <b>MN1-TEL<sup>+</sup> (n = 6)</b>                  | 46.7 ± 10.1            | 11.2 ± 0.7             | 472.3 ± 85.1             |
| <b>MN1-TEL<sup>+</sup>/ENU<sup>+</sup> (n = 10)</b> | 50.3 ± 13.2            | 11.9 ± 1.0             | 381.8 ± 83.5             |
| <b>Control<sup>****</sup> (n = 5)</b>               | 7.2 ± 1.6              | 13.3 ± 0.1             | 854.0 ± 21.8             |

\* White blood cell count (mean ± SE x 10<sup>3</sup>/mm<sup>3</sup>)

\*\* Hemoglobin value (mean ± SE g/dl)

\*\*\* Platelet count (mean ± SE x 10<sup>3</sup>/mm<sup>3</sup>)

\*\*\*\* Control healthy MN1-TEL<sup>+</sup> mice (3 months after induction)
