# Supplementary material
Source: PubMed Central journal article supplement (PMC1895241)
Supplement: blood_2005-04-1674_2.pdf [file blood_2005-04-1674_2.pdf]

| Mouse # | CD4   | CD8  |
|---------|-------|------|
| 1       | 12.6* | 17.4 |
| 2       | 36.6  | 87.6 |
| 3       | 6.3   | 53.5 |
| 4       | 6.9   | 27.6 |
| 5       | 20.8  | 76.7 |
| 6       | 25.6  | 98   |

\*percent positive in GFP<sup>+</sup> cells
