# Supplementary material
Source: PubMed Central journal article supplement (PMC1895241)
Supplement: blood_2005-04-1674_3.pdf [file blood_2005-04-1674_3.pdf]

| Mouse # | CD4   | CD8  |
|---------|-------|------|
| 1       | 25.1* | 65.4 |
| 2       | 14.8  | 98.3 |
| 3       | 41.7  | 98.8 |
| 4       | 54.8  | 86.2 |
| 5       | 15.9  | 40.6 |
| 6       | 1.1   | 87.4 |
| 7       | 2     | 99.3 |
| 8       | 6.8   | 54.8 |
| 9       | 5.8   | 64.1 |
| 10      | 3     | 76.5 |
| 11      | 34    | 61   |
| 12      | 10.8  | 98.7 |
| 13      | 2.6   | 99.4 |

\*percent positive in GFP<sup>+</sup> cells
