# Supplementary material
Source: PubMed Central journal article supplement (PMC1895241)
Supplement: blood_2005-04-1674_4.pdf [file blood_2005-04-1674_4.pdf]

| Tumor # | Notch-1 | Hes-1 | c-Myc | Lmo-2 | Cyclin D1 | CDK4 | pRB   |
|---------|---------|-------|-------|-------|-----------|------|-------|
| 1       | UP*     | UP    | UP    | UP    | NC        | NC   | DN*** |
| 2       | UP      | UP    | NC**  | NC    | NC        | NC   | DN    |
| 3       | UP      | UP    | UP    | NC    | NC        | NC   | DN    |
| 4       | UP      | UP    | UP    | UP    | UP        | NC   | DN    |
| 5       | UP      | UP    | UP    | NC    | NC        | NC   | DN    |

\*up-regulated; expression level > upper limit of 95% confidence interval (CI) in control samples

\*\*not changed

\*\*\*down-regulated; expression level < lower limit of 95% CI in control samples
